# Supplementary material for: A Deep Learning Model for Cell Growth Inhibition IC50 Prediction and Its Application for Gastric Cancer Patients
Source: MDPI journal article supplement (doi:10.3390/ijms20246276), 2019-12-12
Supplement: s1 [file s1]

# **A deep learning model for cell growth inhibition IC50 prediction and its application for gastric cancer patients**

Joo *et al.*

## **Supplementary Information**

Supplementary Figures S1 through S3

Supplementary Tables S1 through S12

**Supplementary Figure S1.** Performance of the all methods in the GDSC test set. AUC of the class versus other classes (i.e., one-vs-rest) was obtained.

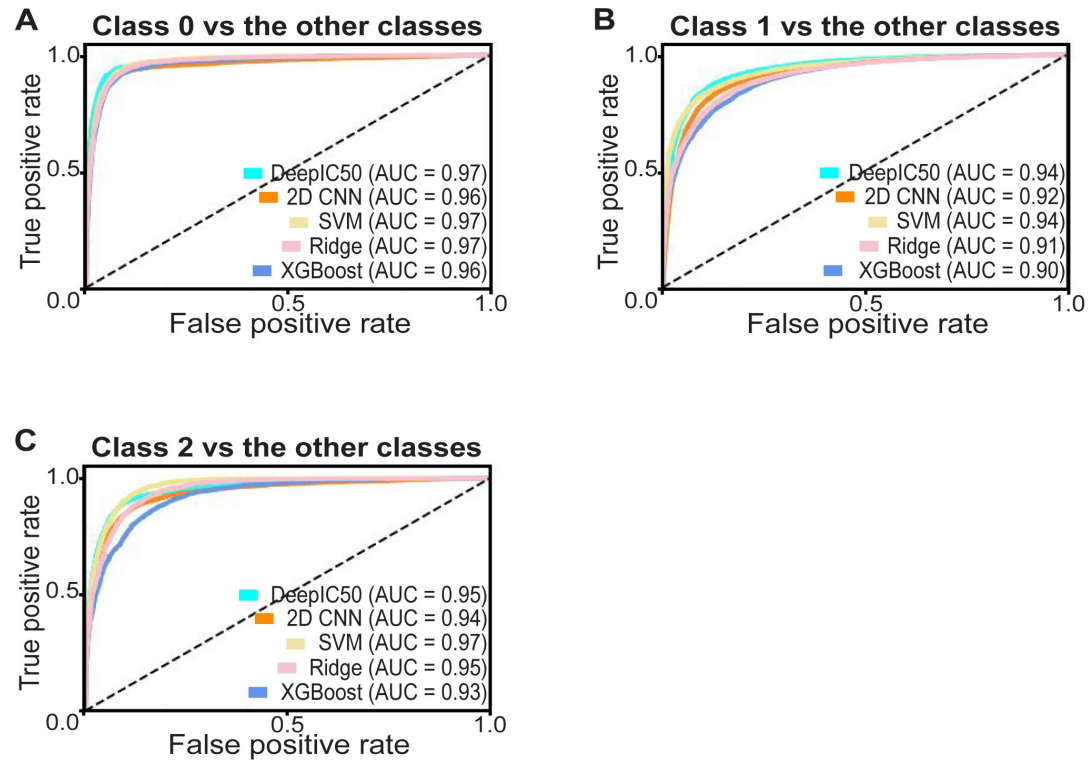

**Supplementary Figure S2.** Performance of the all methods in the CCLE set.

AUC of the class versus other classes (i.e., one-vs-rest) was obtained. It is noted that the CCLE dataset did not have class 2 cases.

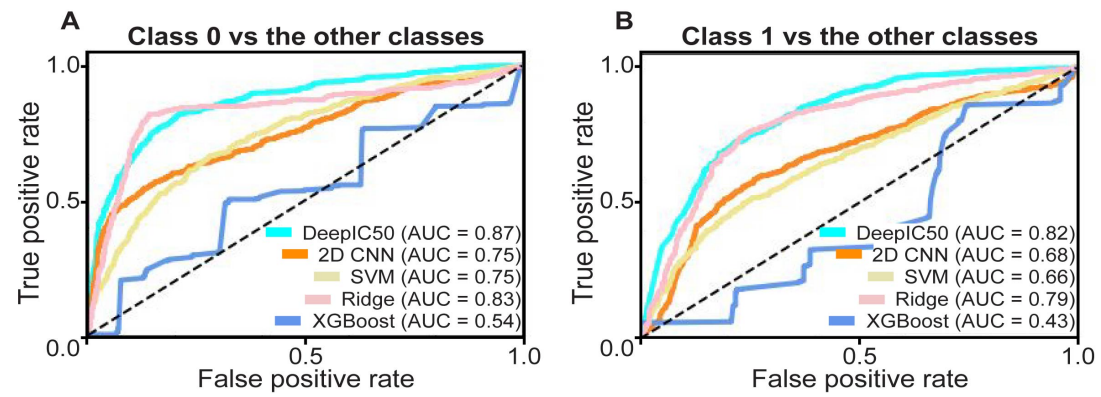

**Supplementary Figure S3.** Distribution of patient drug responsiveness predicted by all the methods in the TCGA GC patient dataset.

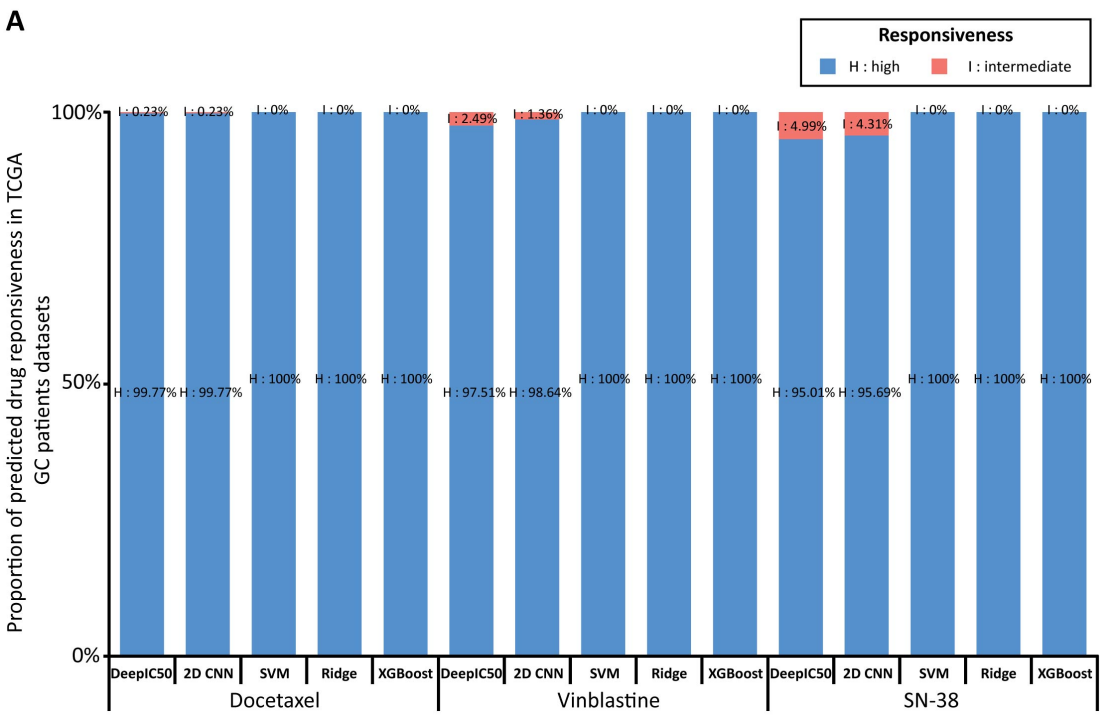

**Supplementary Table S1.** Confusion matrix of DeepIC50 in the GDSC test set.

| Observed \ Predicted | Class 0 | Class 1 | Class 2 |
|----------------------|---------|---------|---------|
|                      | Class 0 | Class 1 | Class 2 |
| Class 0              | 2,123   | 831     | 0       |
| Class 1              | 460     | 25,644  | 504     |
| Class 2              | 0       | 1,077   | 1,436   |

**Supplementary Table S2.** Confusion matrix of 2D CNN in the GDSC test set.

| Predicted<br>Observed | Class 0 | Class 1 | Class 2 |
|-----------------------|---------|---------|---------|
| Class 0               | 2,171   | 783     | 0       |
| Class 1               | 677     | 25,170  | 761     |
| Class 2               | 1       | 1,025   | 1,487   |

**Supplementary Table S3.** Confusion matrix of SVM in the GDSC test set.

| Predicted<br>Observed | Class 0 | Class 1 | Class 2 |
|-----------------------|---------|---------|---------|
| Class 0               | 2,103   | 851     | 0       |
| Class 1               | 639     | 25,682  | 287     |
| Class 2               | 0       | 1,408   | 1,105   |

**Supplementary Table S4.** Confusion matrix of ridge classifier in the GDSC test set.

| Observed \ Predicted |         |         |         |
|----------------------|---------|---------|---------|
|                      | Class 0 | Class 1 | Class 2 |
| Class 0              | 2,118   | 836     | 0       |
| Class 1              | 795     | 25,478  | 335     |
| Class 2              | 0       | 1,568   | 945     |



**Supplementary Table S5.** Confusion matrix of XGBoost in the GDSC test set.

| Observed \ Predicted | Class 0 | Class 1 | Class 2 |
|----------------------|---------|---------|---------|
|                      | Class 0 | Class 1 | Class 2 |
| Class 0              | 1,976   | 978     | 0       |
| Class 1              | 663     | 25,698  | 247     |
| Class 2              | 0       | 1,683   | 830     |

**Supplementary Table S6.** Confusion matrix of DeepIC50 in the CCLE test set.

| Observed \ Predicted | Class 0 | Class 1 | Class 2 |
|----------------------|---------|---------|---------|
|                      | Class 0 | Class 1 | Class 2 |
| Class 0              | 210     | 333     | 1       |
| Class 1              | 52      | 2,192   | 26      |
| Class 2              | 0       | 0       | 0       |

**Supplementary Table S7.** Confusion matrix of 2D CNN in the CCLE test set.

| Predicted<br>Observed | Class 0 | Class 1 | Class 2 |
|-----------------------|---------|---------|---------|
| Class 0               | 159     | 325     | 60      |
| Class 1               | 49      | 1,781   | 440     |
| Class 2               | 0       | 0       | 0       |

**Supplementary Table S8.** Confusion matrix of SVM in the CCLE dataset.

| Predicted<br>Observed | Class 0 | Class 1 | Class 2 |
|-----------------------|---------|---------|---------|
| Class 0               | 23      | 508     | 13      |
| Class 1               | 8       | 2,186   | 76      |
| Class 2               | 0       | 0       | 0       |

**Supplementary Table S9.** Confusion matrix of ridge classifier in the CCLE data set.

| Observed \ Predicted |         |         |         |
|----------------------|---------|---------|---------|
|                      | Class 0 | Class 1 | Class 2 |
| Class 0              | 1       | 541     | 2       |
| Class 1              | 0       | 2,262   | 8       |
| Class 2              | 0       | 0       | 0       |

**Supplementary Table S10.** Confusion matrix of XGBoost in the CCLE data set.

| Observed \ Predicted |         |         |         |
|----------------------|---------|---------|---------|
|                      | Class 0 | Class 1 | Class 2 |
| Class 0              | 0       | 544     | 0       |
| Class 1              | 0       | 2270    | 0       |
| Class 2              | 0       | 0       | 0       |

**Supplementary Table S11.** The number of parameters in the DeepIC50 model.

| Layer (type)            | Output Shape      | Parameters  |
|-------------------------|-------------------|-------------|
| Input Layer             | (None, 27889, 1)  | 0           |
| Convolution Layer 1     | (None, 27889, 16) | 192         |
| Batch normalization     | (None, 27889, 16) | 64          |
| Convolution Layer 2     | (None, 27889, 16) | 2,832       |
| Batch normalization     | (None, 27889, 16) | 64          |
| Max Pooling 1           | (None, 13945, 16) | 0           |
| Convolution Layer 3     | (None, 13945, 32) | 5,664       |
| Batch normalization     | (None, 13945, 32) | 128         |
| Convolution Layer 4     | (None, 13945, 32) | 11,296      |
| Max Pooling 2           | (None, 6973, 32)  | 0           |
| Batch normalization     | (None, 6973, 32)  | 128         |
| Convolution Layer 5     | (None, 6973, 64)  | 22,592      |
| Batch normalization     | (None, 6973, 64)  | 256         |
| Max Pooling 3           | (None, 3487, 64)  | 0           |
| Convolution Layer 6     | (None, 3487, 64)  | 45,120      |
| Batch normalization     | (None, 3487, 64)  | 256         |
| Max Pooling 4           | (None, 1744, 64)  | 0           |
| Flatten                 | (None, 111616)    | 0           |
| Fully Connected Layer 1 | (None, 1024)      | 114,295,808 |
| Batch normalization     | (None, 1024)      | 4,096       |
| Dropout 1               | (None, 1024)      | 0           |
| Fully Connected Layer 2 | (None, 2048)      | 2,099,200   |
| Batch normalization     | (None, 2048)      | 8,192       |
| Dropout 2               | (None, 2048)      |             |
| Fully Connected Layer 3 | (None, 4096)      | 8,392,704   |
| Batch normalization     | (None, 4096)      | 16,384      |
| Dropout 3               | (None, 4096)      | 0           |
| Fully Connected Layer 4 | (None, 2048)      | 8,390,656   |
| Batch normalization     | (None, 2048)      | 8,192       |
| Dropout 4               | (None, 2048)      | 0           |
| Fully Connected Layer 5 | (None, 1024)      | 2,098,176   |
| Batch normalization     | (None, 1024)      | 4,096       |
| Dropout 5               | (None, 1024)      | 0           |
| Output Layer            | (None, 3)         | 3,075       |
| Total parameters        |                   | 135,409,171 |

**Supplementary Table S12.** The number of parameters in the 2D CNN model.

| Layer (type)            | Output Shape         | Parameters  |
|-------------------------|----------------------|-------------|
| Input Layer             | (None, 167, 167, 1)  | 0           |
| Convolution Layer 1     | (None, 167, 167, 16) | 1,952       |
| Batch normalization     | (None, 167, 167, 16) | 64          |
| Convolution Layer 2     | (None, 167, 167, 16) | 30,992      |
| Batch normalization     | (None, 167, 167, 16) | 64          |
| Max Pooling 1           | (None, 84, 84, 16)   | 0           |
| Convolution Layer 3     | (None, 84, 84, 32)   | 61,984      |
| Batch normalization     | (None, 84, 84, 32)   | 128         |
| Convolution Layer 4     | (None, 84, 84, 32)   | 123,936     |
| Batch normalization     | (None, 84, 84, 32)   | 128         |
| Max Pooling 2           | (None, 42, 42, 32)   | 0           |
| Convolution Layer 5     | (None, 42, 42, 64)   | 247,872     |
| Batch normalization     | (None, 42, 42, 64)   | 256         |
| Convolution Layer 6     | (None, 42, 42, 64)   | 495,680     |
| Batch normalization     | (None, 42, 42, 64)   | 256         |
| Max Pooling 3           | (None, 21, 21, 64)   | 0           |
| Convolution Layer 7     | (None, 21, 21, 128)  | 991,360     |
| Batch normalization     | (None, 21, 21, 128)  | 512         |
| Max Pooling 4           | (None, 11, 11, 128)  | 0           |
| Convolution Layer 8     | (None, 11, 11, 128)  | 1,982,592   |
| Batch normalization     | (None, 11, 11, 128)  | 512         |
| Flatten                 | (None, 15488)        | 0           |
| Fully Connected Layer 1 | (None, 8192)         | 126,885,888 |
| Batch normalization     | (None, 8192)         | 32,768      |
| Fully Connected Layer 2 | (None, 4096)         | 33,558,528  |
| Batch normalization     | (None, 4096)         | 16,384      |
| Fully Connected Layer 3 | (None, 2048)         | 8,390,656   |
| Batch normalization     | (None, 2048)         | 8,192       |
| Fully Connected Layer 4 | (None, 1024)         | 2,098,176   |
| Batch normalization     | (None, 1024)         | 4,096       |
| Output Layer            | (None, 3)            | 3,075       |
| Total parameters        |                      | 174,936,051 |
